# Supplementary material
Source: PubMed Central journal article supplement (PMC6531908)
Supplement: Supp_Fig1.pdf [file Supp_Fig1.pdf]

## Supplementary Data: Powell et al

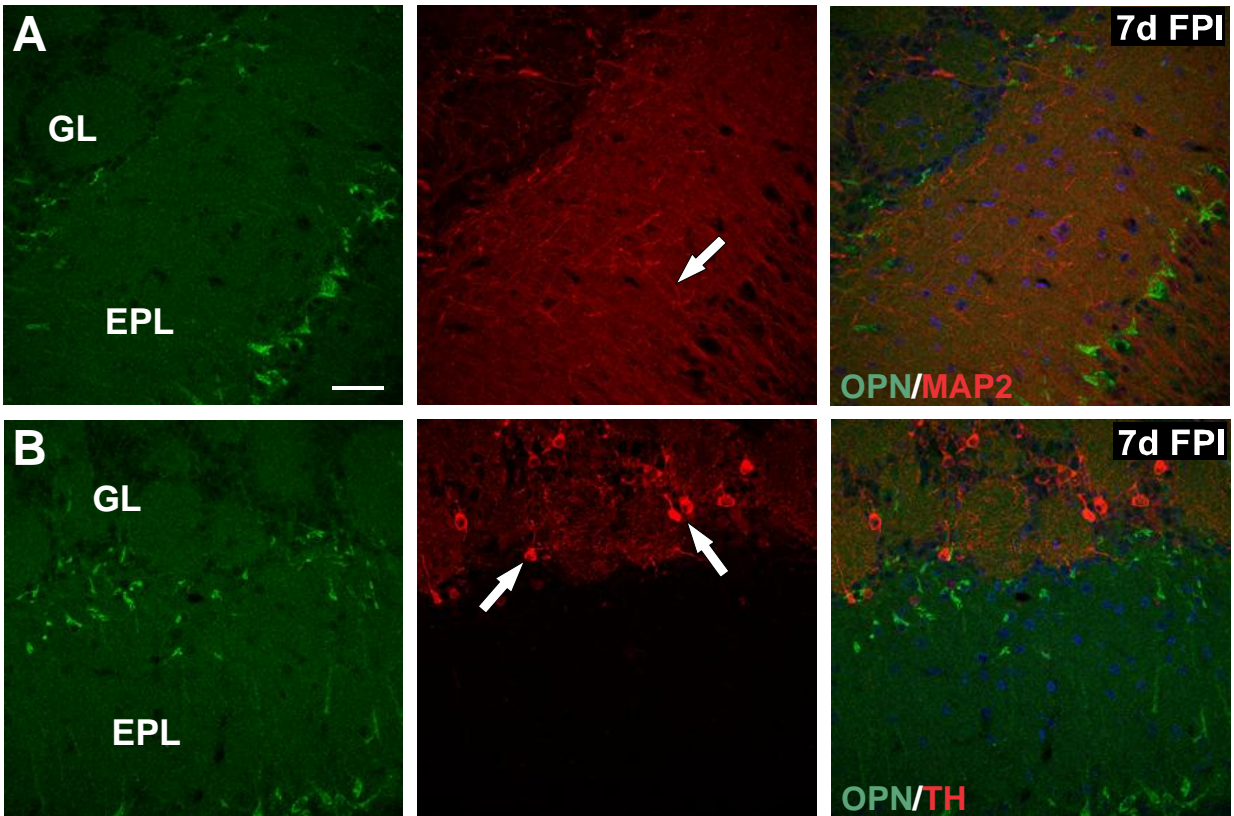

**Figure S1: OPN is not co-expressed with MAP2 or TH in OB post-synaptic neurons**  
**A.** Imaging shows absence of OPN (*green*) and MAP2 (*red*) co-localization at 7d postinjury. MAP2 signal is present in dendrites (*white arrow*) throughout the OB, higher within dendrite-rich EPL. Principal OPN signal was predominant in cell soma of presumptive tufted and mitral neurons. **B.** OPN (*green*) was not found within tyrosine hydroxylase positive (TH; *red*) inhibitory periglomerular neurons (*white arrows*), suggesting that OPN positive cells at the GL/EPL border are likely post-synaptic tufted neurons. Scale bar = 50µm. N=3-4/group.
