# Supplementary material
Source: PubMed Central journal article supplement (PMC6531908)
Supplement: Supp_Fig2.pdf [file Supp_Fig2.pdf]

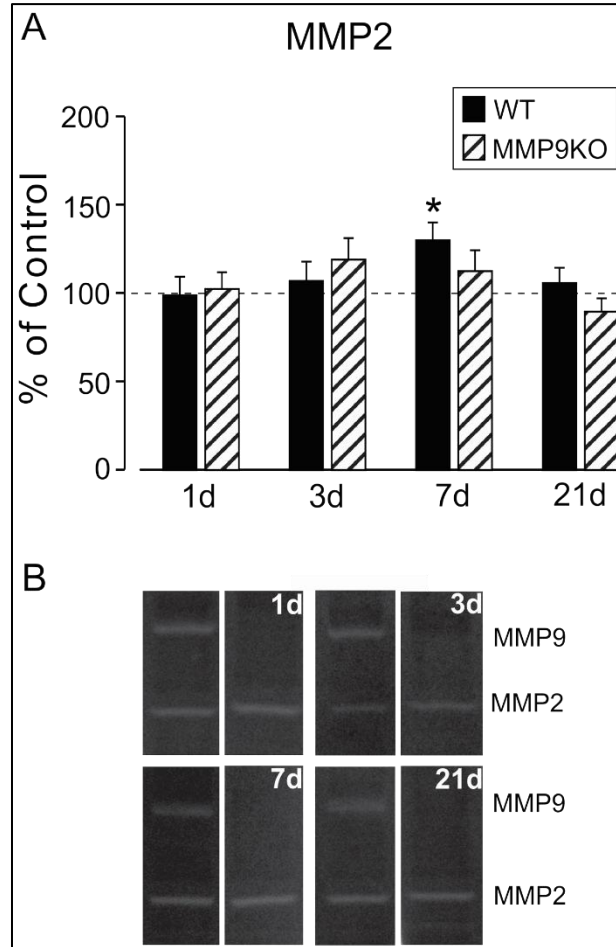

**Figure S2: MMP9 KO does not affect OB MMP2 response to mFPI**

**A.** Postinjury OB zymography in MMP9 KO mice failed to show compensatory increase in proteolytic activity. WT MMP2 activity (replotted from Figure 1) was modestly increased at 7d, consistent with MMP2 role in onset of synaptic regeneration. MMP2 activity in the postinjury MMP9 KO was not different from controls for any postinjury time point sampled. Notably, loss of MMP9 did normalize 7d MMP2 activity, however, post hoc analysis failed to show strain differences. **B.** Representative zymogram images of sham WT (left) and MMP9 KO injured (right). Results are expressed as percent of sham control R.O.D. (100% dashed line). \* $p < 0.05$  vs. sham.  $n = 4-7$ /group.
