# Supplementary material
Source: PubMed Central journal article supplement (PMC6531908)
Supplement: Supp_Fig3.pdf [file Supp_Fig3.pdf]

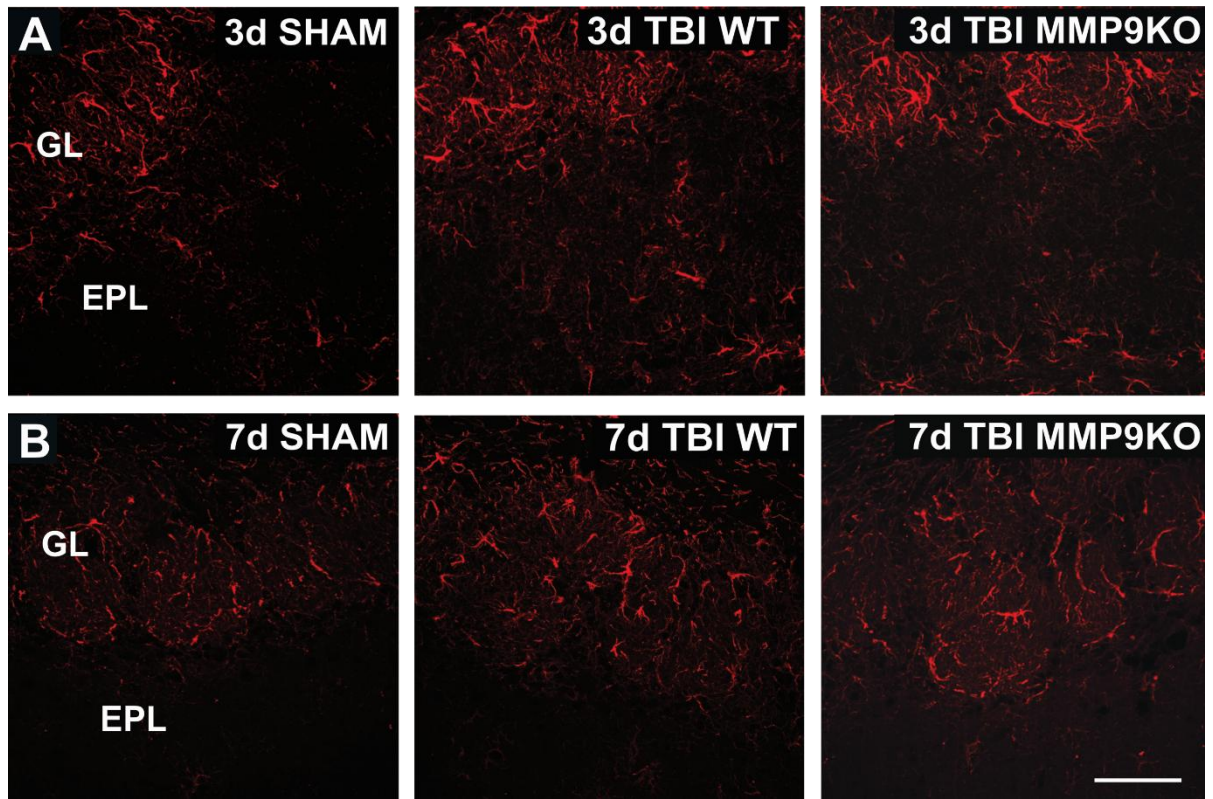

**Figure S3: Loss of MMP9 does not affect glial reactivity after mFPI**

**A.** Imaging of GFAP in 3d MMP9 KO OB (*right panel*) was similar to WT injured cases (*center panel*), with astrocytes showing similar reactive hypertrophy. **B.** As for 3d, injured MMP9 KO animals at 7d also showed little change in astrocyte morphology relative to WT. Bar= 50 $\mu$ m. n=3-4/group.
